# Supplementary material for: PCGF6 controls neuroectoderm specification of human pluripotent stem cells by activating SOX2 expression
Source: PubMed Central journal article supplement (PMC9357003; doi:10.1038/s41467-022-32295-z), 2022-08-06
Supplement: 41467_2022_32295_MOESM3_ESM.pdf [file 41467_2022_32295_MOESM3_ESM.pdf]

### **Description of Additional Supplementary Files**

File Name: Supplementary Data 1

Description: Differentially expressed genes upon PCGF6 KO

File Name: Supplementary Data 2

Description: PCGF6 bound genes and MYC bound genes
